# Supplementary material
Source: publisher site journal article supplement (https://www.dovepress.com/article/227617)
Supplement: Supplementary file 1 [file get_supplementary_file.php]

**Appendix 1** Self-care behavior assessment questionnaire among the elderly

| **Self-care behaviors** | **Frequency of practice in 3 months*** | | | |
| --- | --- | --- | --- | --- |
| **Never** | **Rarely** | **Sometimes** | **Regularly** |
| (1) Universal self-care requisites such as food and water consumption, adequate air, excretion, waste drainage, activity and relaxation, personal time and social interaction, prevention of health hazards, and health promotion and development. | | | | |
| 1. Eat 3 meals a day, a variety of foods from 5 food groups |  |  |  |  |
| 2. Eat fruits and vegetables every day |  |  |  |  |
| 3. Eating raw food |  |  |  |  |
| 4. Reduce eating high-fat foods |  |  |  |  |
| 5. Reduce eating fried foods |  |  |  |  |
| 6. Reduce eating food or desserts cooked with coconut milk or butter |  |  |  |  |
| 7. Avoid eating very salty foods such as fermented foods |  |  |  |  |
| 8. Avoid eating sugary foods |  |  |  |  |
| 9. Drink at least 8 glasses of water a day |  |  |  |  |
| 10. Drink plain milk/skim milk, 1-2 glasses/boxes per day |  |  |  |  |
| 11. Avoid drinking sugary beverages such as soft drink |  |  |  |  |
| 12. Eating betel nut, betel |  |  |  |  |
| 13. Take supplements such as vitamins, herbs |  |  |  |  |
| 14. Smoking and tobacco use |  |  |  |  |
| 15. Drinking alcohol, tea, coffee and energy drinks |  |  |  |  |
| 16. Drink water from mountain water supply, wells, rainwater |  |  |  |  |
| 17. Avoid being in the area of ​​incineration or smoke |  |  |  |  |
| 18. Arrange the housing to be ventilated |  |  |  |  |
| 19. Avoid using materials that are affecting the environment such as foam, plastic bag |  |  |  |  |
| 20. Having difficulty urinating |  |  |  |  |
| 21. Urinary incontinence |  |  |  |  |
| 22. Urinary frequency/dysuria |  |  |  |  |
| 23. Constipation |  |  |  |  |
| 24. Diarrhea |  |  |  |  |
| 25. Rectal Bleeding |  |  |  |  |
| 26. Alternating diarrhea and constipation |  |  |  |  |
| 27. Exercise at least 3 days a week for 30 minutes |  |  |  |  |
| 28. Movement in household or occupational works at least 30 minutes a day, 3-4 days a week |  |  |  |  |
| 29. Daytime sleep more than 2 hours |  |  |  |  |
| 30. Sleep at night more than 7 hours |  |  |  |  |
| 31. Insomnia |  |  |  |  |
| 32. Participating in community activities |  |  |  |  |
| 33. Attending in religious activities |  |  |  |  |
| 34. Involvement in village/community activities to protect the environment |  |  |  |  |
| 35. Keeping the floor dry for accident prevention at home |  |  |  |  |
| 36. Avoiding stairs or steep slopes |  |  |  |  |
| 37. Keeping the house in order |  |  |  |  |
| 38. Handle railing when going up and down the stairs |  |  |  |  |
| 39. Walking slowly carefully |  |  |  |  |
| 40. Washing hands with soap before eating |  |  |  |  |
| 41. Washing hands with soap after visiting the toilet |  |  |  |  |
| 42. Taking a shower 2 times a day (morning/evening) |  |  |  |  |
| 43. Washing hair at least 2 times a week |  |  |  |  |
| 44. Brushing your teeth twice a day |  |  |  |  |
| (2) Development self-care requisites consisting of activities that promote the emotional and mental development of the elderly such as praying or doing meditation. | | | | |
| 45. When feeling uncomfortable, you relieve stress through prayer and meditation |  |  |  |  |
| 46. When feeling uncomfortable, you relieve stress by watching movies, listening to music, singing |  |  |  |  |
| 47. When feeling uncomfortable, you relieve stress by planting trees |  |  |  |  |
| 48. When feeling uncomfortable, you relieve stress by exercising |  |  |  |  |
| 49. When feeling uncomfortable, you relieve stress by counseling with friends or a family member |  |  |  |  |
| 50. When feeling uncomfortable, you relieve stress by smoking |  |  |  |  |
| 51. When feeling uncomfortable, you relieve stress by drinking alcohol |  |  |  |  |
| 52. When feeling uncomfortable, you relieve stress by using sleeping pills/sedatives |  |  |  |  |
| 53. You can control your emotions when you feel angry |  |  |  |  |
| 54. You do activities together with family members on a daily basis such as watching TV |  |  |  |  |
| 55. You do activities together with family members during festivals/holidays such as vacation |  |  |  |  |
| 56. You participate in recreational activities with your group such as friends, neighbors, work colleagues |  |  |  |  |
| (3) Health deviation self-care requisites consisting of activities for self-care behaviors according to their physical structures or health functions. | | | | |
| 57. When illness occurs, you buy your medicines at the store |  |  |  |  |
| 58. When illness occurs, you take herbal medicine |  |  |  |  |
| 59. When illness occurs, you see a doctor, nurse, or health officer near your home |  |  |  |  |
| 60. When illness occurs, you go to the clinic near your home |  |  |  |  |
| 61. When illness occurs, you apologize to the household deity and guardian spirit |  |  |  |  |
| 62. When illness occurs, you pay respect to the blessing (supernatural) |  |  |  |  |
| 63. When illness occurs, you stop working immediately |  |  |  |  |

*For positive question: never practice at all =1 point, practice once in a while = 2 points, practice sometimes = 3 points and practice regularly = 4 points; for negative question: never practice at all =4 points, practice once in a while = 3 points, practice sometimes = 2 points and practice regularly = 1 point.
